# Supplementary material for: Survival Response to Increased Ceramide Involves Metabolic Adaptation through Novel Regulators of Glycolysis and Lipolysis
Source: PubMed Central journal article supplement (PMC3688504; doi:10.1371/journal.pgen.1003556), 2013-06-20
Supplement: pgen.1003556.s010.pdf [file pgen.1003556.s010.pdf]

INCREASED GENES

| ID           | Annotation ID | logFC       | Normalized log2 transformed intensity |             |              |             |              |             |              |             |          |          | Present Call |         |         |         |  |
|--------------|---------------|-------------|---------------------------------------|-------------|--------------|-------------|--------------|-------------|--------------|-------------|----------|----------|--------------|---------|---------|---------|--|
|              |               |             | P.Value                               | adj.P.Value | X2W1118.A    | X2W1118.B   | X2W1118.C    | CK163.D     | CK163.E      | CK163.F     | 2W1118-A | 2W1118-B | 2W1118-C     | CK163-D | CK163-E | CK163-F |  |
| 1623027_s_at | CG6277        | 2.959166147 | 2.70E-07                              | 0.000121102 | 6.342676672  | 6.597616121 | 6.938717895  | 9.475316474 | 9.663041646  | 9.618151011 | P        | P        | P            | P       | P       |         |  |
| 1623109_at   | CG4593        | 1.879859455 | 2.00E-05                              | 0.002359057 | 6.746528993  | 6.390288784 | 6.91159318   | 8.825080329 | 8.25256337   | 8.610349522 | A        | P        | P            | P       | P       |         |  |
| 1623179_at   | CG15415       | 1.113543899 | 0.001516842                           | 0.039697096 | 7.184653372  | 6.719814173 | 6.882137961  | 8.447002696 | 7.612246366  | 8.06798814  | P        | P        | P            | P       | P       |         |  |
| 1623296_at   | CG32625       | 2.159222734 | 0.000170982                           | 0.009502767 | 7.326325141  | 6.657830318 | 7.060635649  | 9.779940755 | 8.651159593  | 9.091358961 | P        | P        | P            | P       | P       |         |  |
| 1623398_at   | CG4830        | 2.24893279  | 2.42E-05                              | 0.002642525 | 5.123362932  | 5.024681029 | 5.806601698  | 7.453483444 | 7.861573032  | 7.386432552 | A        | A        | P            | P       | P       |         |  |
| 1623486_at   | CG7900        | 2.815149144 | 8.50E-09                              | 1.55E-05    | 5.597499541  | 5.650449126 | 5.491494196  | 8.284967966 | 8.471890676  | 8.428031654 | M        | A        | P            | P       | P       |         |  |
| 1623521_at   | CG11909       | 5.935632832 | 9.93E-09                              | 1.57E-05    | 4.411348521  | 4.567716442 | 4.189699712  | 9.916919427 | 10.604176258 | 10.45456716 | A        | A        | P            | P       | P       |         |  |
| 1623601_at   | CG8221        | 1.407805069 | 2.45E-05                              | 0.002642525 | 5.265567158  | 5.48985005  | 5.423135943  | 6.504977265 | 6.891428572  | 7.00556252  | P        | P        | P            | P       | P       |         |  |
| 1623689_a_at | CG14642       | 1.417316836 | 0.000666548                           | 0.023480343 | 6.35981525   | 6.907862689 | 6.458761825  | 7.522034023 | 8.414344257  | 8.042011991 | P        | P        | P            | P       | P       |         |  |
| 1623789_at   | CG31776       | 1.16346141  | 0.000168532                           | 0.009449771 | 4.464969391  | 4.489089141 | 4.542270079  | 5.31388432  | 5.96218471   | 5.710643813 | A        | A        | M            | A       | P       |         |  |
| 1624092_at   | CG31039       | 1.36642372  | 1.83E-05                              | 0.002245684 | 10.70791616  | 11.08587506 | 10.59990135  | 12.20351921 | 12.11325563  | 12.17618889 | P        | P        | P            | P       | P       |         |  |
| 1624269_at   | CG8825        | 1.88875888  | 0.000277303                           | 0.012944444 | 5.36427518   | 4.660004283 | 5.170654363  | 7.359874501 | 6.387225625  | 7.114110342 | P        | A        | P            | P       | P       |         |  |
| 1624332_s_at | CG18217       | 1.137631994 | 5.27E-05                              | 0.004327818 | 7.2713400397 | 7.092287421 | 7.19249308   | 8.547549074 | 8.07832969   | 8.343138118 | P        | P        | P            | P       | P       |         |  |
| 1624817_at   | CG3212        | 1.322955112 | 0.000145151                           | 0.008644504 | 5.241388766  | 4.790030238 | 4.780836691  | 6.478509097 | 5.965626378  | 6.336985554 | A        | A        | P            | M       | P       |         |  |
| 1624914_at   | CG8690        | 1.393153473 | 0.001445856                           | 0.038326774 | 7.713618457  | 6.53380057  | 7.959096789  | 9.21199345  | 9.906499756  | 9.387062515 | P        | P        | P            | P       | P       |         |  |
| 1625042_at   | CG31288       | 1.912736107 | 2.39E-06                              | 0.0005758   | 6.809833149  | 8.766817999 | 8.582392437  | 10.27535883 | 10.69774056  | 10.72415252 | P        | P        | P            | P       | P       |         |  |
| 1625153_at   | CG33105       | 2.302904437 | 2.36E-06                              | 0.0005758   | 5.189181938  | 5.248716202 | 5.685304739  | 7.469315215 | 7.887331082  | 7.675269893 | A        | A        | P            | P       | P       |         |  |
| 1625366_at   | CG4125        | 1.146958909 | 0.000127153                           | 0.007889929 | 7.841430975  | 7.599595966 | 7.858777827  | 9.026130281 | 8.606285251  | 9.108265962 | P        | P        | P            | P       | P       |         |  |
| 1625382_at   | CG1151        | 1.857103594 | 2.96E-07                              | 0.000123885 | 4.492953661  | 4.257314494 | 4.558452082  | 6.293024813 | 6.289138297  | 6.297867908 | A        | A        | P            | P       | P       |         |  |
| 1625720_at   | CG32006       | 1.496767782 | 0.00054672                            | 0.02086273  | 5.390477437  | 5.548193342 | 5.29859069   | 6.380035473 | 7.445243079  | 6.902286264 | P        | P        | P            | P       | P       |         |  |
| 1625860_s_at | CG32939       | 1.286479181 | 1.23E-05                              | 0.001800345 | 7.905086489  | 7.799921315 | 8.125332319  | 9.381999488 | 9.102511952  | 9.205266226 | P        | P        | P            | P       | P       |         |  |
| 1625965_a_at | CG1148        | 1.264845476 | 0.000149843                           | 0.008803017 | 5.055869158  | 4.460438794 | 4.876654823  | 5.915254709 | 6.004612379  | 6.627632116 | A        | A        | A            | P       | A       |         |  |
| 1626138_s_at | CG10579       | 1.304423563 | 9.42E-05                              | 0.006288919 | 6.895602852  | 8.2991989   | 8.468145966  | 9.478998278 | 9.985376014  | 9.911844115 | P        | P        | P            | P       | P       |         |  |
| 1626164_at   | CG31380       | 1.683574394 | 2.10E-05                              | 0.002407133 | 5.641130207  | 6.232063333 | 5.715155728  | 7.394837789 | 7.634687051  | 7.609547611 | A        | A        | P            | P       | P       |         |  |
| 1626248_at   | CG18547       | 1.07840115  | 6.09E-05                              | 0.004689685 | 8.120937158  | 7.859865721 | 7.700026181  | 8.846878891 | 9.069079221  | 9.000074399 | P        | P        | P            | P       | P       |         |  |
| 1626324_at   | Cyp309a1      | 1.116709018 | 0.001624948                           | 0.041336931 | 6.821870946  | 7.643272308 | 6.869474604  | 8.046269964 | 8.292341461  | 8.346133486 | P        | P        | P            | P       | P       |         |  |
| 1626394_at   | CG18030       | 1.941231581 | 0.000458938                           | 0.018694095 | 8.275184503  | 7.811329534 | 8.827658184  | 10.69055034 | 10.31181619  | 9.735500435 | P        | P        | P            | P       | P       |         |  |
| 1626405_at   | CG8357        | 1.101793815 | 9.58E-05                              | 0.003294919 | 5.809657964  | 5.789730464 | 6.130135839  | 6.786345478 | 7.144333037  | 7.104227196 | P        | P        | P            | P       | P       |         |  |
| 1626435_at   | CG15263       | 2.030410592 | 0.000242439                           | 0.01184202  | 5.034723437  | 5.356905132 | 5.298078955  | 6.803115738 | 7.98478861   | 6.993034951 | A        | P        | P            | P       | P       |         |  |
| 1626742_at   | CG8964        | 1.079207013 | 0.000863258                           | 0.0275549   | 6.191117348  | 5.713287359 | 5.787035842  | 7.206760977 | 6.604257747  | 7.118042865 | P        | M        | P            | P       | P       |         |  |
| 1626882_at   | CG8807        | 1.368692949 | 8.39E-06                              | 0.001328147 | 6.380439349  | 6.492161825 | 6.259247195  | 7.73015444  | 7.939270727  | 7.568502047 | P        | P        | P            | P       | P       |         |  |
| 1626908_at   | CG8066        | 1.424827952 | 0.00017018                            | 0.009486019 | 5.085509669  | 4.651100249 | 4.927866847  | 6.518722648 | 6.519407696  | 5.900830275 | M        | A        | P            | P       | P       |         |  |
| 1627119_at   | CG8329        | 1.39330624  | 1.18E-05                              | 0.001735154 | 6.844124824  | 8.497191458 | 8.581254088  | 9.84417762  | 10.23245016  | 9.819861308 | P        | P        | P            | P       | P       |         |  |
| 1627162_at   | CG31681       | 1.516094181 | 0.000773553                           | 0.025856043 | 9.105998831  | 8.359657449 | 8.785521918  | 10.66957315 | 9.769085111  | 10.36080248 | P        | P        | P            | P       | P       |         |  |
| 1627169_at   | CG3264        | 2.257265586 | 0.000651282                           | 0.023332882 | 5.91528653   | 4.763429845 | 6.005781851  | 8.419226186 | 7.427822521  | 7.609246278 | P        | A        | P            | P       | P       |         |  |
| 1627499_at   | CG2016        | 1.108234821 | 4.30E-06                              | 0.000839949 | 7.981472602  | 7.749270468 | 7.870588562  | 8.984216774 | 8.945750718  | 8.996068602 | P        | P        | P            | P       | P       |         |  |
| 1627633_at   | CG8932        | 1.18857068  | 6.91E-06                              | 0.00115953  | 6.904310123  | 6.990755907 | 6.72730907   | 7.957565338 | 8.089550015  | 8.140971788 | P        | P        | P            | P       | P       |         |  |
| 1627669_at   | CG1791        | 1.770590536 | 4.62E-07                              | 0.000176219 | 6.106535245  | 5.962206176 | 5.890384563  | 7.698939    | 7.896544996  | 7.675413596 | P        | P        | P            | P       | P       |         |  |
| 1627736_at   | CG11062       | 1.302420119 | 0.000232297                           | 0.01152483  | 4.647962539  | 4.408264924 | 4.490354065  | 5.456938363 | 6.21712341   | 5.779780113 | P        | A        | P            | P       | P       |         |  |
| 1627869_at   | character(0)  | 1.51079125  | 7.99E-07                              | 0.000260441 | 10.04780058  | 10.1072847  | 9.854907985  | 11.5600649  | 11.50920575  | 11.47309664 | P        | P        | P            | P       | P       |         |  |
| 1627972_at   | CG9822        | 1.348857627 | 2.94E-05                              | 0.002984522 | 4.496938576  | 4.69723884  | 4.233609918  | 5.898763993 | 5.931895454  | 5.643700768 | A        | A        | P            | P       | P       |         |  |
| 1628806_at   | CG5279        | 2.152122354 | 3.87E-07                              | 0.000152998 | 6.539212465  | 6.60435732  | 6.297582752  | 8.469780201 | 8.757250883  | 8.670488514 | A        | A        | P            | P       | P       |         |  |
| 1628918_at   | character(0)  | 1.612420886 | 0.000658277                           | 0.023426692 | 5.169374477  | 4.474718375 | 4.505513703  | 6.868913858 | 6.000717613  | 6.11723774  | P        | A        | P            | P       | P       |         |  |
| 1629242_x_at | character(0)  | 1.855179353 | 8.25E-07                              | 0.000260441 | 7.378233317  | 7.14699654  | 6.993821439  | 8.971651374 | 9.004694937  | 9.108243044 | P        | M        | P            | P       | P       |         |  |
| 1629362_at   | CG32475       | 2.041153275 | 1.34E-05                              | 0.001895088 | 4.687422035  | 4.877440209 | 4.107680691  | 6.555061434 | 6.604440205  | 6.636501121 | A        | A        | P            | P       | P       |         |  |
| 1629718_at   | CG16727       | 1.597613636 | 4.57E-05                              | 0.003918992 | 7.180317949  | 7.429845855 | 7.094194308  | 8.54779548  | 9.200323077  | 8.749080464 | P        | P        | P            | P       | P       |         |  |
| 1629955_at   | CG13309       | 1.999005054 | 2.22E-07                              | 0.000108057 | 7.941152655  | 8.037759794 | 7.854010957  | 10.10327819 | 9.835447571  | 9.891212811 | P        | P        | P            | P       | P       |         |  |
| 1630065_at   | CG20065       | 2.229956323 | 1.20E-07                              | 8.41E-05    | 6.44356419   | 6.440264672 | 6.526107926  | 8.519997935 | 8.727624317  | 8.852183504 | P        | P        | P            | P       | P       |         |  |
| 1630109_at   | CG8628        | 2.142967566 | 1.29E-07                              | 8.74E-05    | 8.837176436  | 8.772496294 | 8.644316802  | 11.02291777 | 10.90316835  | 10.7568061  | P        | P        | P            | P       | P       |         |  |
| 1630244_s_at | CG31809       | 1.69709993  | 4.65E-07                              | 0.000176219 | 5.759034871  | 5.641414689 | 5.844459686  | 7.499189124 | 7.519353765  | 7.317666146 | P        | P        | P            | P       | P       |         |  |
| 1630255_at   | CG31676       | 1.022603732 | 1.55E-05                              | 0.002050097 | 8.190308821  | 8.051763777 | 8.192399771  | 9.064175414 | 9.311653077  | 9.083295073 | P        | P        | P            | P       | P       |         |  |
| 1630359_at   | CG31810       | 2.20605863  | 3.86E-06                              | 0.000804164 | 4.500707338  | 5.114913121 | 4.683362906  | 6.921142058 | 7.154172399  | 6.841844797 | A        | A        | P            | P       | A       |         |  |
| 1630555_at   | CG33346       | 4.75462026  | 1.19E-08                              | 5.966599088 | 6.159419726  | 5.965599088 | 6.159419726  | 10.45365549 | 10.8024956   | 10.78399065 | P        | P        | P            | P       | P       |         |  |
| 1630598_at   | CG18179       | 2.357241505 | 3.33E-05                              | 0.003222748 | 6.496612108  | 6.501759681 | 6.05970285   | 8.148835447 | 8.923060892  | 9.057902814 | P        | A        | P            | P       | P       |         |  |
| 1630645_at   | CG3528        | 1.918090452 | 0.000153769                           | 0.008924426 | 5.176927551  | 5.432851343 | 5.501191689  | 6.73890026  | 7.830870635  | 7.295471042 | P        | A        | P            | P       | P       |         |  |
| 1630660_at   | CG14033       | 1.230339253 | 0.001587761                           | 0.040884855 | 5.97539226   | 5.97539226  | 6.2233050564 | 7.84976449  | 6.807953566  | 7.418109003 | P        | P        | P            | P       | P       |         |  |
| 1630740_at   | CG4363        | 1.458691836 | 0.000454402                           | 0.018680761 | 8.222762752  | 9.191216343 | 8.550108393  | 9.966754174 | 10.26448771  | 10.10892111 | P        | P        | P            | P       | P       |         |  |
| 1630842_s_at | CG32640       | 1.418817326 | 4.62E-06                              | 0.000881182 | 9.160499989  | 9.037463864 | 9.189647881  | 10.71026758 | 10.58707456  | 10.34672097 | P        | P        | P            | P       | P       |         |  |
| 1630886_at   | CG6584        | 1.044786766 | 5.62E-06                              | 0.001034847 | 8.522079582  | 8.526460327 | 8.594280203  | 9.688361521 | 9.479800237  | 9.609018652 | P        | P        | P            | P       | P       |         |  |
| 1630957_s_at | CG11128       | 1.505832235 | 3.36E-06                              | 0.000715581 | 8.736543109  | 8.572277773 | 8.5889176    | 10.30240637 | 9.938096009  | 10.17473281 | P        | P        | P            | P       | P       |         |  |
| 1631127_at   | CG10424       | 1.215446737 | 3.17E-06                              | 0.000714333 | 7.226908084  | 7.038096267 | 7.070939717  | 8.429835359 | 8.272148017  | 8.280300903 | P        | P        | P            | P       | P       |         |  |
| 1631165_at   | CG4688        | 1.100364847 | 4.09E-05                              | 0.003620352 | 5.680850437  | 5.70128969  | 5.49739868   | 6.588958791 | 6.639046162  | 6.952628395 | A        | A        | P            | P       | P       |         |  |
| 1631349      |               |             |                                       |             |              |             |              |             |              |             |          |          |              |         |         |         |  |

|              |              |              |             |              |             |             |             |             |             |             |   |   |   |   |   |
|--------------|--------------|--------------|-------------|--------------|-------------|-------------|-------------|-------------|-------------|-------------|---|---|---|---|---|
| 1632001_at   | CG7102       | 1.226809913  | 7.75E-05    | 0.005539949  | 4.553783146 | 4.654566717 | 4.66229659  | 5.965395906 | 5.514658194 | 6.071022091 | A | A | P | P | P |
| 1632003_a_at | character(0) | 1.143571123  | 1.93E-05    | 0.002298045  | 7.426893879 | 7.107633991 | 7.41082039  | 8.541427767 | 8.361544009 | 8.473089774 | P | P | P | P | P |
| 1632120_at   | CG15533      | 1.28334589   | 1.86E-05    | 0.0022545684 | 7.672641412 | 7.787316793 | 7.455007041 | 8.844149085 | 8.806355592 | 9.11449791  | P | P | P | P | P |
| 1632624_at   | CG11330      | 1.7253972    | 0.000198339 | 0.010355154  | 7.370757858 | 6.87504589  | 7.218754581 | 9.303261097 | 8.37614145  | 8.961347383 | P | P | P | P | P |
| 1633009_a_at | CG6640       | 1.44943204   | 8.14E-05    | 0.00569423   | 7.446229593 | 7.417336248 | 6.99328551  | 8.443663282 | 8.987940545 | 8.773543644 | P | P | P | P | P |
| 1633048_at   | CG8193       | 1.028949791  | 0.000544536 | 0.02086273   | 7.223224255 | 6.947743797 | 7.293090919 | 8.512949019 | 8.134975032 | 9.702992375 | P | P | P | P | P |
| 1633147_at   | CG10659      | 1.338968791  | 8.02E-05    | 0.00569423   | 6.381309117 | 6.433704803 | 6.31232418  | 7.812620358 | 7.988025798 | 7.343598317 | P | P | P | P | P |
| 1633167_s_at | CG32496      | 3.604430264  | 6.59E-06    | 0.00112443   | 6.839022405 | 6.551488059 | 6.111456991 | 9.515251243 | 10.62864646 | 10.17136054 | P | P | P | P | P |
| 1633208_at   | character(0) | 1.331710034  | 7.09E-05    | 0.00520307   | 6.016830305 | 6.390396127 | 5.746437579 | 7.398897336 | 7.431617842 | 7.318278935 | A | A | P | P | P |
| 1633214_at   | CG4835       | 1.068469523  | 0.000435355 | 0.018213787  | 4.676959565 | 5.190754673 | 4.938803505 | 5.797261506 | 5.933570839 | 6.281093966 | A | A | A | P | P |
| 1633304_at   | CG1967       | 1.204671947  | 4.32E-05    | 0.003750719  | 8.663847715 | 8.309336589 | 8.773368967 | 9.891725986 | 9.699970891 | 9.768872234 | P | P | P | P | P |
| 1633471_at   | CG11765      | 3.673887364  | 4.12E-06    | 0.000822723  | 7.040452362 | 6.92999387  | 7.742852179 | 10.39312901 | 11.24741471 | 11.09441679 | P | P | P | P | P |
| 1633540_at   | CG8147       | 1.37387587   | 0.001417395 | 0.038156917  | 8.505093219 | 7.619945689 | 8.655328789 | 9.418356295 | 9.823459986 | 9.660179027 | P | P | P | P | P |
| 1633545_at   | CG7496       | 1.580084421  | 3.21E-05    | 0.003184376  | 7.103733403 | 7.758199523 | 7.548365589 | 8.951291122 | 9.049738606 | 9.14952205  | P | P | P | P | P |
| 1633639_at   | CG10833      | 1.325571441  | 9.65E-05    | 0.006329419  | 9.253208991 | 9.737859789 | 9.264844068 | 10.50783818 | 10.90380282 | 10.82098617 | P | P | P | P | P |
| 1633727_s_at | CG8789       | 1.450693072  | 3.17E-06    | 0.000701433  | 7.117608341 | 6.767088616 | 7.057496872 | 8.472123731 | 8.416644171 | 8.405505142 | P | P | P | P | P |
| 1633880_s_at | CG8533       | 2.126610828  | 2.48E-05    | 0.002657923  | 4.990268899 | 5.133843334 | 4.69969514  | 7.463920003 | 6.637754503 | 7.101965352 | A | A | P | P | P |
| 1634097_s_at | CG6300       | 1.372743918  | 4.10E-06    | 0.00822723   | 6.119794414 | 6.106831568 | 6.423176959 | 7.559149805 | 7.644574432 | 7.564310458 | P | P | P | P | P |
| 1634125_at   | CG30440      | 1.134562747  | 0.00039596  | 0.016901437  | 7.478203854 | 7.068582588 | 7.238784072 | 8.702909957 | 8.070937167 | 8.415411632 | P | P | P | P | P |
| 1634152_at   | CG12242      | 1.57396792   | 0.00019037  | 0.010191796  | 5.644062993 | 5.908115823 | 5.15456732  | 6.962710231 | 7.474761461 | 6.991178206 | P | P | P | P | P |
| 1634468_at   | CG13397      | 1.009293286  | 0.001351964 | 0.036813821  | 7.750504465 | 7.598436449 | 7.56997595  | 8.926987616 | 8.179803173 | 8.840005932 | P | P | P | P | P |
| 1634514_at   | CG33258      | 1.027042303  | 0.000237891 | 0.011680063  | 9.768414289 | 10.21495257 | 9.887734182 | 10.77000529 | 11.14855223 | 11.03367044 | P | P | P | P | P |
| 1634515_at   | CG8093       | 1.168795198  | 0.001826358 | 0.044719805  | 8.527391696 | 9.460473959 | 8.61121584  | 9.988757292 | 9.971436944 | 10.14527285 | P | P | P | P | P |
| 1634591_at   | CG11878      | 1.239891464  | 9.18E-05    | 0.006195013  | 8.797247767 | 9.008038399 | 8.61540627  | 9.827118826 | 10.17529246 | 10.21075554 | P | P | P | P | P |
| 1634633_s_at | character(0) | 5.343108161  | 1.94E-10    | 3.27E-06     | 6.232515027 | 6.033482776 | 5.939397228 | 11.3577907  | 11.45629439 | 11.42063442 | A | A | P | P | P |
| 1634786_at   | CG7106       | 1.329145363  | 0.000526267 | 0.020564548  | 7.368847701 | 8.069374262 | 7.921695645 | 9.036226734 | 9.449846183 | 8.861280779 | P | P | P | P | P |
| 1634815_at   | CG31104      | 1.938325402  | 1.92E-05    | 0.002298045  | 7.58412587  | 8.236427497 | 7.842723765 | 9.600190069 | 10.07091581 | 9.807180256 | P | P | P | P | P |
| 1634903_at   | CG9981       | 1.710951115  | 3.34E-06    | 0.000715581  | 5.018412441 | 4.839749904 | 5.074482331 | 6.85108514  | 6.44303513  | 6.77137775  | P | P | P | P | P |
| 1634991_at   | CG8083       | 1.468739306  | 1.25E-06    | 0.00374983   | 7.907003238 | 8.088642659 | 7.896621739 | 9.311715281 | 9.483130316 | 9.506339959 | P | P | P | P | P |
| 1635306_at   | CG4650       | 3.13122076   | 8.15E-07    | 0.000260441  | 4.136377545 | 3.963678917 | 4.515505422 | 7.237978824 | 7.10260071  | 7.668644631 | A | A | P | P | P |
| 1635343_a_at | CG3217       | 1.097848745  | 5.41E-05    | 0.004404509  | 7.559871835 | 7.356096876 | 7.631104961 | 8.8253768   | 8.444352809 | 8.570890299 | P | P | P | P | P |
| 1635725_a_at | CG31352      | 1.190485302  | 1.30E-05    | 0.001865182  | 8.747206034 | 8.865272175 | 8.890341243 | 9.83338689  | 10.18945419 | 10.05143428 | P | P | P | P | P |
| 1635770_at   | CG31097      | 1.904109631  | 1.86E-07    | 0.00010363   | 4.98955717  | 5.018347142 | 4.761307058 | 6.847033325 | 6.788025312 | 6.846481626 | A | A | P | P | P |
| 1635936_at   | CG13822      | 1.885672776  | 5.91E-06    | 0.001065853  | 7.272138607 | 6.798159247 | 7.163704446 | 9.185725759 | 8.815316014 | 8.889978856 | P | P | P | P | P |
| 1636031_at   | CG1294       | 1.43381376   | 0.000623698 | 0.02273141   | 4.637857711 | 4.710042704 | 4.565009098 | 6.680242718 | 5.710820692 | 5.823287382 | A | A | P | P | P |
| 1636073_at   | CG32344      | 1.095855026  | 0.000371102 | 0.016094103  | 7.694794218 | 7.256183303 | 7.576873495 | 8.851162454 | 8.306071864 | 8.658181776 | P | P | P | P | P |
| 1636194_s_at | character(0) | 2.984935194  | 0.000561221 | 0.021315167  | 4.939551722 | 4.94147534  | 5.233905036 | 8.982994967 | 6.796077793 | 8.290664921 | A | A | P | P | P |
| 1636409_at   | CG11034      | 1.473061649  | 6.31E-06    | 0.001097775  | 5.77053115  | 5.364133856 | 5.582721906 | 7.156905779 | 7.035842841 | 6.943823238 | P | P | P | P | P |
| 1636423_at   | CG8012       | 1.440423562  | 6.91E-07    | 0.000233806  | 9.042716266 | 9.211930442 | 9.063289771 | 10.52331274 | 10.6261957  | 10.48969872 | P | P | P | P | P |
| 1636974_at   | CG32146      | 1.539477464  | 1.37E-05    | 0.001900535  | 7.3043746   | 6.855668159 | 7.123054829 | 8.76074195  | 8.431276062 | 8.709511969 | P | P | P | P | P |
| 1637055_s_at | character(0) | 2.420947468  | 9.67E-08    | 7.33E-05     | 7.057394521 | 7.025500777 | 7.679549754 | 9.247264128 | 9.431329003 | 9.436694324 | A | A | P | P | P |
| 1637462_at   | CG13833      | 1.057263427  | 0.00026029  | 0.012368345  | 8.134683335 | 8.568454386 | 8.148825894 | 9.192529552 | 9.571764446 | 9.259459897 | P | P | P | P | P |
| 1637467_at   | CG5245       | 1.381171241  | 0.001908544 | 0.046018733  | 3.971309646 | 4.111431229 | 4.314073662 | 6.11338544  | 4.894136388 | 5.532806434 | A | A | P | P | P |
| 1637481_at   | CG6890       | 1.175494915  | 2.38E-05    | 0.002642525  | 7.376229128 | 7.131753894 | 7.382491671 | 8.554591108 | 8.278073454 | 8.584294874 | P | P | P | P | P |
| 1637567_at   | CG30360      | 1.4450553831 | 0.000209194 | 0.010773467  | 9.018570774 | 9.724924131 | 9.234995416 | 10.5130064  | 11.02157387 | 10.77907154 | P | P | P | P | P |
| 1637659_a_at | CG18146      | 1.10634063   | 1.40E-05    | 0.001920181  | 6.021460586 | 6.035589843 | 5.873446062 | 6.928303516 | 7.228582958 | 7.092631906 | P | P | P | P | P |
| 1637857_at   | CG3410       | 3.310398521  | 8.36E-08    | 6.82E-05     | 3.69307044  | 3.860165609 | 3.763992291 | 7.248681653 | 6.759609141 | 7.240133109 | A | A | P | P | P |
| 1638080_at   | CG13658      | 2.676573581  | 2.75E-07    | 0.000121102  | 4.420731553 | 4.242532925 | 4.433470556 | 6.981066561 | 7.32323331  | 6.822065906 | A | M | P | P | P |
| 1638182_at   | CG5999       | 1.087658066  | 0.000422685 | 0.01784128   | 7.490541244 | 7.604617379 | 7.213900854 | 8.431167716 | 8.862707196 | 8.278158764 | P | P | P | P | P |
| 1638264_at   | CG1304       | 4.111902332  | 4.56E-10    | 3.27E-06     | 4.173437526 | 4.267848338 | 4.319840953 | 8.361597928 | 8.452735253 | 8.282500631 | A | P | P | P | P |
| 1638393_at   | character(0) | 1.348286599  | 2.53E-05    | 0.002680896  | 5.136887509 | 4.85981782  | 4.872243954 | 6.548898905 | 6.252483753 | 6.11242642  | P | P | P | P | P |
| 1638407_at   | CG31244      | 3.264344205  | 8.02E-06    | 0.001299345  | 5.235829542 | 4.963566002 | 4.815610264 | 7.704101759 | 8.869815727 | 8.234120936 | A | A | P | P | P |
| 1638428_at   | character(0) | 1.083470188  | 1.28E-05    | 0.001848769  | 6.733119648 | 6.703349636 | 6.515788944 | 7.637134372 | 7.705289096 | 7.860245324 | M | P | P | P | P |
| 1638687_at   | character(0) | 1.981382039  | 1.06E-06    | 0.000301534  | 4.346408857 | 3.918112877 | 4.01928086  | 6.060316538 | 6.170721262 | 5.996910911 | A | A | P | P | P |
| 1638812_at   | CG11501      | 3.437839843  | 2.39E-05    | 0.002642525  | 5.230500635 | 5.153153423 | 6.225765855 | 9.440117964 | 8.443491941 | 9.039329537 | A | A | P | P | P |
| 1639009_at   | CG10962      | 1.153205445  | 0.000810457 | 0.026528104  | 4.760248757 | 4.58550508  | 4.967556714 | 6.309344469 | 5.514163941 | 5.949418477 | P | P | P | P | P |
| 1639036_at   | CG8857       | 1.517799407  | 7.55E-05    | 0.005420958  | 7.384149332 | 6.735918238 | 7.218038257 | 8.836907866 | 8.450704232 | 8.60389195  | P | P | P | P | P |
| 1639180_at   | CG12505      | 1.366748853  | 3.96E-06    | 0.000812158  | 11.38409838 | 11.29169986 | 11.32746585 | 12.51181807 | 12.74385889 | 12.8578337  | P | P | P | P | P |
| 1639222_at   | CG32191      | 1.103365735  | 3.48E-05    | 0.003294454  | 7.032700237 | 7.291537878 | 7.099080687 | 8.073989945 | 8.420590911 | 8.238835153 | P | P | P | P | P |
| 1639262_at   | CG11669      | 1.858291683  | 0.000474009 | 0.018992433  | 7.833409666 | 8.974263178 | 8.529106005 | 10.02953644 | 10.6962279  | 10.18588955 | P | P | P | P | P |
| 1639272_at   | CG3739       | 1.590090153  | 0.000321793 | 0.014417545  | 8.6946591   | 9.406164047 | 8.83368913  | 10.16840252 | 10.91047818 | 10.62590204 | P | P | P | P | P |
| 1639280_at   | CG6322       | 1.040886263  | 0.000375693 | 0.016255106  | 7.750444905 | 7.499590136 | 7.764029363 | 9.01260521  | 8.408227526 | 8.715890458 | P | P | P | P | P |
| 1639323_at   | CG31508      | 2.314126452  | 0.001630786 | 0.041429834  | 8.600616664 | 9.427295126 | 10.63907568 | 11.83439461 | 11.65287727 | 12.12209494 | P | P | P | P | P |
| 1639401_at   | CG8696       | 1.420882009  | 0.000152291 | 0.008980896  | 10.343136   | 11.05450624 | 10.65       |             |             |             |   |   |   |   |   |

|                       |              |             |             |             |              |             |             |             |             |             |   |   |   |   |   |   |
|-----------------------|--------------|-------------|-------------|-------------|--------------|-------------|-------------|-------------|-------------|-------------|---|---|---|---|---|---|
| 1639896_at            | character(0) | 1.976307587 | 0.000614673 | 0.022488953 | 4.768196077  | 4.758474882 | 4.850679508 | 7.169286995 | 5.904443074 | 7.232543159 | P | P | P | P | P | P |
| 1639903_at            | CG2071       | 2.308330001 | 2.22E-07    | 0.000108057 | 6.725051036  | 6.367218644 | 6.458443314 | 8.747457753 | 8.948665257 | 8.779579986 | P | P | P | P | P | P |
| 1639907_at            | CG11951      | 1.773806019 | 3.99E-06    | 0.000812158 | 4.8711140992 | 4.447182324 | 4.398271774 | 6.429406732 | 6.327536888 | 6.281069529 | A | P | P | P | P | P |
| 1640109_at            | CG9481       | 1.036719461 | 0.000532019 | 0.000661544 | 6.145157227  | 6.40172441  | 5.931790468 | 7.001509928 | 7.068009097 | 7.080519652 | P | P | P | P | P | P |
| 1640167_s_at          | CG34104      | 1.349072318 | 1.58E-06    | 0.000421003 | 10.17003369  | 10.18956254 | 10.02294614 | 11.37238618 | 11.48723193 | 11.57014122 | P | P | P | P | P | P |
| 1640566_at            | CG1944       | 1.664425213 | 9.68E-07    | 0.000282235 | 4.472578885  | 4.609202461 | 4.383175911 | 6.003482906 | 6.17956885  | 6.27518114  | A | A | P | P | P | P |
| 1640587_at            | CG15214      | 1.170872466 | 0.000951861 | 0.029621774 | 5.14155032   | 5.309988198 | 4.930942098 | 6.098677302 | 6.784029791 | 6.012390919 | A | A | P | P | P | P |
| 1640746_at            | CG18542      | 1.146161903 | 2.43E-06    | 0.0005758   | 8.429958509  | 8.408375452 | 8.459278323 | 9.692479852 | 9.524128633 | 9.519489507 | P | P | P | P | P | P |
| 1641174_at            | CG7361       | 4.400741271 | 2.72E-08    | 3.04E-05    | 4.39316231   | 3.993173548 | 3.74622034  | 8.475428895 | 8.522522564 | 8.336830447 | A | A | P | P | P | P |
| 1641190_at            | CG6580       | 3.703055158 | 5.85E-09    | 1.39E-05    | 7.318400832  | 7.371429482 | 7.624085393 | 11.26514279 | 11.05201764 | 11.10592075 | P | P | P | P | P | P |
| 1641235_at            | CG14102      | 1.278728152 | 9.89E-05    | 0.006463675 | 6.46869155   | 6.390423832 | 6.627909086 | 8.049489615 | 7.437689702 | 7.836029606 | P | P | P | P | P | P |
| 1641245_a_at          | character(0) | 1.583547811 | 0.000124773 | 0.007778581 | 5.436292627  | 4.96196582  | 5.531056811 | 7.268656276 | 6.737848797 | 6.673453616 | P | P | P | P | P | P |
| 1641268_at            | CG13313      | 1.739272342 | 2.42E-05    | 0.002642525 | 4.540748557  | 5.081901258 | 4.474389715 | 6.263687626 | 6.463102909 | 6.588066023 | A | A | A | A | A | A |
| 1641626_at            | CG18233      | 1.920848253 | 0.000478206 | 0.019094484 | 4.126569571  | 3.736684756 | 3.937426778 | 5.18992962  | 6.528985063 | 5.844311179 | A | A | P | P | A | A |
| 1641729_at            | CG13043      | 1.75818391  | 5.79E-05    | 0.004550507 | 4.814469853  | 5.275390363 | 4.736366376 | 6.321369047 | 6.878364716 | 6.901044562 | A | A | P | P | P | P |
| AFFX-Dm-K01486-1_at   | character(0) | 2.854138677 | 1.43E-07    | 9.02E-05    | 4.055372845  | 3.76173587  | 3.869298249 | 6.646196855 | 7.00317186  | 6.599454279 | A | A | P | P | P | P |
| AFFX-Dm-U57609-2_s_at | character(0) | 4.900354811 | 5.21E-10    | 3.27E-06    | 4.674778709  | 4.787779415 | 4.747117512 | 9.517859394 | 9.826438135 | 9.566442541 | A | A | P | P | P | P |

### DECREASED GENES

| ID           | Annotation ID | logFC        | P.Value     | adj.P.Val   | X2W1118.A   | X2W1118.B   | X2W1118.C   | CK163.D     | CK163.E     | CK163.F     | 2W1118-A.CEL | 2W1118-B.CEL | 2W1118-C.CEL | CK163-D.CEL | CK163-E.CEL | CK163-F.CEL |
|--------------|---------------|--------------|-------------|-------------|-------------|-------------|-------------|-------------|-------------|-------------|--------------|--------------|--------------|-------------|-------------|-------------|
| 1622920_at   | CG7875        | -1.149896659 | 2.50E-05    | 0.002658615 | 10.59257018 | 10.57265036 | 10.52957771 | 9.168707065 | 9.523114089 | 9.553287121 | P            | P            | P            | P           | P           | P           |
| 1623051_at   | CG18125       | -1.89357408  | 0.001667698 | 0.041989558 | 9.438451479 | 8.131103112 | 9.730623075 | 7.071990589 | 7.278582211 | 7.268882628 | P            | P            | P            | P           | P           | P           |
| 1623211_at   | CG17234       | -2.235038792 | 0.001201294 | 0.03448763  | 8.622669576 | 7.48597553  | 9.370780014 | 6.153115814 | 6.192304577 | 6.42888352  | P            | P            | P            | P           | P           | P           |
| 1623346_at   | CG2861        | -1.001693605 | 0.002032502 | 0.04767323  | 6.113129663 | 6.544429999 | 6.377506938 | 4.956520776 | 5.748809239 | 5.32465577  | P            | P            | M            | P           | P           | P           |
| 1623410_at   | CG3477        | -1.823617898 | 0.001328296 | 0.036538614 | 7.247344574 | 7.165439017 | 7.125864824 | 4.451775558 | 5.699691563 | 5.9163276   | P            | P            | A            | A           | A           | A           |
| 1623477_at   | character(0)  | -3.029720994 | 7.88E-07    | 0.000260441 | 9.072946869 | 8.433269495 | 8.702720593 | 5.466035397 | 5.746421651 | 5.907316927 | P            | P            | A            | A           | P           | A           |
| 1623675_at   | CG7592        | -1.680618681 | 6.99E-05    | 0.005174052 | 13.1068675  | 13.77975005 | 13.00578651 | 11.64488796 | 11.51170285 | 11.6939572  | P            | P            | P            | P           | P           | P           |
| 1623790_at   | CG31901       | -2.228355106 | 1.66E-07    | 9.54E-05    | 9.929653418 | 9.1940181   | 9.753164142 | 7.401510452 | 7.621038538 | 7.694605063 | P            | P            | P            | P           | P           | P           |
| 1623871_at   | CG18563       | -1.000223071 | 0.000780309 | 0.025936863 | 6.261640543 | 5.713671741 | 5.765020847 | 4.663933347 | 5.022723351 | 5.05300722  | P            | P            | A            | M           | M           | M           |
| 1624137_at   | CG11911       | -1.155987921 | 0.000121456 | 0.007672753 | 12.41992803 | 12.04942865 | 12.37415423 | 11.22503348 | 11.28821438 | 10.86229929 | P            | P            | P            | P           | P           | P           |
| 1624212_at   | CG6784        | -1.557300642 | 0.000564832 | 0.021390103 | 7.131405858 | 7.899752534 | 7.325794056 | 5.550537311 | 6.35311035  | 5.781402863 | P            | P            | P            | P           | P           | P           |
| 1624508_at   | CG13526       | -1.226006906 | 0.000285765 | 0.01324163  | 7.901961451 | 8.503233616 | 8.093781118 | 6.671114848 | 7.119933895 | 7.029906725 | P            | P            | P            | P           | P           | P           |
| 1624543_s_at | character(0)  | -2.067127248 | 1.98E-07    | 0.000107058 | 8.204327932 | 8.27562032  | 8.357234942 | 6.13546777  | 6.391467478 | 6.108866201 | P            | P            | P            | P           | P           | P           |
| 1624802_at   | CG31686       | -1.722300347 | 0.001305007 | 0.036211554 | 8.015059999 | 6.84081966  | 8.196280093 | 6.092515748 | 5.885276375 | 5.907466589 | P            | P            | P            | P           | P           | P           |
| 1624819_s_at | character(0)  | -1.913623137 | 2.26E-05    | 0.002548493 | 6.653584593 | 6.589139807 | 6.61471132  | 5.119274698 | 4.302210362 | 4.695081251 | P            | P            | P            | P           | P           | P           |
| 1624957_a_at | CG4821        | -3.127907497 | 1.52E-07    | 9.17E-05    | 10.5784306  | 10.28439694 | 10.28439694 | 7.018149567 | 7.479945185 | 7.191527345 | P            | P            | P            | P           | P           | P           |
| 1624991_at   | CG11611       | -3.214374123 | 4.78E-08    | 4.32E-05    | 8.420288317 | 8.876518176 | 8.698305394 | 5.56730232  | 5.371606282 | 5.413080917 | P            | P            | A            | P           | M           | P           |
| 1625050_s_at | character(0)  | -1.494989554 | 0.000139016 | 0.008363933 | 8.551455026 | 8.505697314 | 8.58430268  | 6.62718091  | 7.477261882 | 7.052046383 | P            | P            | P            | P           | P           | P           |
| 1625124_at   | CG10146       | -2.482853969 | 8.22E-05    | 0.005715502 | 8.439110244 | 7.468935321 | 8.099657835 | 5.991324086 | 5.5081003   | 5.059717108 | P            | P            | P            | P           | M           | M           |
| 1625135_at   | CG13415       | -1.129627384 | 0.000699264 | 0.024139248 | 6.30284609  | 6.66825614  | 6.364094339 | 5.055836303 | 5.740347423 | 5.148700167 | P            | P            | A            | P           | A           | P           |
| 1625141_at   | CG14715       | -2.665255328 | 8.64E-08    | 9.36281286  | 9.060129622 | 9.060129622 | 9.310692906 | 6.68097795  | 6.413294209 | 6.643597245 | P            | P            | P            | P           | P           | P           |
| 1625195_s_at | CG7734        | -1.899412551 | 6.28E-06    | 0.001097775 | 9.590482553 | 9.722766571 | 9.590503619 | 7.453151566 | 7.679330473 | 8.073033052 | P            | P            | P            | P           | P           | P           |
| 1625287_at   | character(0)  | -1.057835552 | 6.96E-05    | 0.005171237 | 7.320779405 | 7.211662177 | 7.291974863 | 6.091918495 | 6.48785456  | 6.071136734 | P            | P            | P            | P           | P           | P           |
| 1625342_at   | CG33282       | -1.15630994  | 0.000174126 | 0.009649236 | 7.075403723 | 7.431352285 | 6.992521688 | 5.909631173 | 5.845382809 | 6.275333896 | P            | P            | P            | P           | P           | P           |
| 1625359_at   | CG31281       | -3.996198295 | 2.73E-08    | 3.04E-05    | 8.630693806 | 9.159013965 | 8.693493025 | 4.844372341 | 4.913809342 | 4.73642423  | P            | P            | P            | M           | A           | A           |
| 1625375_at   | CG32201       | -1.456409015 | 0.00028678  | 0.013256216 | 5.126349897 | 6.017530432 | 5.354875685 | 4.023058221 | 3.959701822 | 4.146768927 | P            | P            | A            | A           | A           | A           |
| 1625527_at   | CG5265        | -1.538576749 | 0.000463988 | 0.018788319 | 8.868612549 | 9.379378969 | 8.968366688 | 7.092724528 | 8.038036549 | 7.46986688  | P            | P            | P            | P           | P           | P           |
| 1625648_at   | CG3868        | -1.379625669 | 5.83E-07    | 0.000209618 | 12.46183359 | 12.61430986 | 12.4583016  | 11.13945284 | 11.15424944 | 11.0186575  | P            | P            | P            | P           | P           | P           |
| 1625698_at   | CG6639        | -2.402992606 | 0.000338084 | 0.014935601 | 9.2641211   | 7.944824947 | 9.152044475 | 6.735420626 | 5.961384464 | 6.455207613 | P            | P            | P            | P           | P           | P           |
| 1625791_s_at | character(0)  | -1.5139312   | 1.86E-06    | 0.000482701 | 5.648065794 | 5.590553047 | 5.841604403 | 4.205519121 | 4.046876861 | 4.286033302 | P            | P            | A            | A           | A           | A           |
| 1625828_at   | CG11841       | -1.062672688 | 0.000113769 | 0.007284288 | 9.427792816 | 9.76836451  | 9.52268096  | 8.3478578   | 8.74146293  | 8.841499492 | P            | P            | P            | P           | P           | P           |
| 1625862_x_at | character(0)  | -1.10988251  | 3.33E-05    | 0.003227248 | 7.392796425 | 7.451688436 | 7.332912635 | 6.332179416 | 6.464352465 | 6.051218084 | P            | P            | P            | P           | P           | P           |
| 1625957_at   | CG10051       | -1.192808201 | 7.11E-05    | 0.00520307  | 8.899247331 | 6.455257794 | 6.775622374 | 5.568111913 | 5.656962351 | 5.326628633 | P            | P            | P            | P           | P           | P           |
| 1626022_at   | CG14680       | -1.052718612 | 0.000129918 | 0.007942582 | 7.774609797 | 8.004882069 | 7.699992905 | 6.52449276  | 6.838292783 | 6.958543393 | P            | P            | P            | P           | P           | P           |
| 1626123_at   | character(0)  | -1.165535403 | 0.000552494 | 0.021052823 | 8.3999715   | 8.142595142 | 8.425749561 | 7.430187221 | 6.717291084 | 7.324231689 | P            | P            | P            | P           | P           | P           |
| 1626251_at   | CG9668        | -1.13013274  | 6.46E-06    | 0.001113706 | 10.14954707 | 10.12636078 | 10.05930743 | 8.841786034 | 9.116215244 | 8.986815778 | P            | P            | P            | P           | P           | P           |
| 1626257_at   | CG13656       | -1.315633866 | 1.36E-05    | 0.001900535 | 7.267830187 | 7.703275346 | 7.540199698 | 6.255524025 | 6.118397384 | 6.190482223 | P            | P            | P            | P           | P           | P           |
| 1626326_at   | CG31436       | -1.291023621 | 6.78E-07    | 0.000233464 | 8.118867884 | 8.246726551 | 8.21288966  | 6.886067853 | 6.944468418 | 6.874876961 | P            | P            | P            | P           | P           | P           |
| 1626345_at   | CG15231       | -1.062729048 | 0.002080761 | 0.048393481 | 10.04722519 | 10.81676674 | 9.626904885 | 9.312505918 | 9.586382762 | 9.586382762 | P            | P            | P            | P           | P           | P           |
| 1626529_at   | CG12977       | -1.018360693 | 0.000123769 | 0.007741489 | 7.117521079 | 7.162206013 | 7.054668433 | 5.813650047 | 6.154783635 | 6.310879763 | P            | P            | P            | P           | P           | P           |
| 1626540_at   | CG14076       | -1.811523033 | 0.000237658 | 0.011680063 | 7.974688416 | 8.627445661 | 8.059341873 | 5.936435247 | 6.85264758  | 6.437824025 | P            | P            | P            | P           | P           | P           |
| 1627271_at   | CG13422       | -1.04434188  | 0.001603995 | 0.041137352 | 11.45446793 | 10.8367376  | 11.68808483 | 10.26848531 | 10.39116773 | 10.18661168 | P            | P            | P            | P           | P           | P           |
| 1627343_a_at | CG5535        | -1.07898937  | 0.000790002 | 0.026035091 | 9.401760564 | 8.794655372 | 9.330957253 | 8.305739788 | 7.84045182  | 8.144213449 | P            | P            | P            | P           | P           | P           |
| 1627408_at   | CG32107       | -1.586170766 | 2.34E-05    | 0.006219091 | 6.742273024 |             |             |             |             |             |              |              |              |             |             |             |

|              |              |              |             |             |              |             |             |             |             |             |   |   |   |   |   |
|--------------|--------------|--------------|-------------|-------------|--------------|-------------|-------------|-------------|-------------|-------------|---|---|---|---|---|
| 1627759_at   | CG30080      | -1.036438575 | 0.00107973  | 0.03217461  | 6.710190498  | 6.021092007 | 6.466846205 | 5.240486723 | 5.618846978 | 5.229479283 | P | P | M | P | A |
| 1627771_at   | CG13075      | -1.811891551 | 2.54E-06    | 0.00058679  | 7.604375791  | 7.849854839 | 7.411878609 | 5.786240023 | 5.949229329 | 5.694965233 | P | P | A | M | M |
| 1628226_at   | CG8539       | -1.695946427 | 2.49E-06    | 0.000581276 | 7.812741025  | 7.963250639 | 7.921573755 | 6.302272247 | 5.954315813 | 6.353138077 | P | P | P | P | P |
| 1628238_at   | CG10541      | -1.352576224 | 0.001339799 | 0.036629279 | 9.221297715  | 9.586598912 | 9.44375387  | 7.502309626 | 8.599930241 | 8.091681958 | P | P | P | P | P |
| 1628617_at   | CG32282      | -3.625097004 | 1.46E-08    | 1.97E-05    | 11.65169328  | 11.74390638 | 11.67963557 | 8.167633856 | 8.228100945 | 7.804209419 | P | P | P | P | P |
| 1628639_at   | CG5791       | -1.448346125 | 5.95E-05    | 0.004635541 | 10.63036413  | 10.21069127 | 10.79319806 | 8.887038814 | 9.174677863 | 9.227498415 | P | P | P | P | P |
| 1628818_at   | CG17562      | -1.310530363 | 3.55E-06    | 0.000747543 | 10.30110855  | 10.49169055 | 10.20751805 | 8.94193086  | 9.093721604 | 9.033073605 | P | P | P | P | P |
| 1629014_s_at | CG2604       | -1.076529361 | 4.44E-06    | 0.000895921 | 11.16120611  | 11.29365724 | 11.1165996  | 10.16194035 | 10.13605693 | 10.04387759 | P | P | P | P | P |
| 1629083_at   | CG16704      | -1.076573349 | 5.33E-06    | 0.00100059  | 10.96373098  | 10.94894094 | 10.84427686 | 9.985541522 | 9.78866214  | 9.793025065 | P | P | P | P | P |
| 1629184_at   | CG3819       | -3.998484061 | 6.91E-10    | 3.27E-06    | 10.63794639  | 10.62779184 | 10.80953315 | 6.764684085 | 6.626167974 | 6.688967142 | P | P | P | P | P |
| 1629233_s_at | CG16708      | -3.180590512 | 9.59E-07    | 0.000282235 | 9.423351577  | 9.255859106 | 9.373134887 | 5.691672266 | 6.470101962 | 6.348799806 | P | P | P | P | P |
| 1629367_at   | CG15534      | -3.645689552 | 6.62E-09    | 1.40E-05    | 9.037763917  | 9.092288755 | 8.874838288 | 5.268558191 | 5.255676849 | 5.543587264 | P | P | A | A | P |
| 1629462_at   | CG30192      | -1.103978542 | 0.00054105  | 0.020835537 | 8.282133883  | 8.563094546 | 8.439986403 | 7.122458071 | 7.742412676 | 7.108408461 | P | P | P | P | P |
| 1629530_at   | CG15066      | -1.503071341 | 6.29E-05    | 0.004768576 | 11.34823078  | 10.88274816 | 11.54666755 | 9.585448135 | 9.856125286 | 9.826859046 | P | P | P | P | P |
| 1629588_at   | CG14240      | -1.505938035 | 1.58E-05    | 0.002070892 | 6.567378896  | 7.005797514 | 6.944309846 | 5.500999329 | 5.318816395 | 5.179856426 | P | P | P | P | P |
| 1629641_s_at | character(0) | -1.080782012 | 1.42E-05    | 0.001925701 | 5.136320562  | 5.140356499 | 5.16739725  | 4.184203318 | 3.875252748 | 4.142272218 | P | P | A | A | A |
| 1629738_at   | CG14957      | -1.582256537 | 4.23E-05    | 0.00369017  | 5.671870954  | 5.796915466 | 5.192542882 | 4.150907576 | 3.976535266 | 3.787116848 | P | M | A | A | A |
| 1629846_at   | CG11619      | -1.927735357 | 9.08E-07    | 0.000273161 | 7.76366522   | 7.503848038 | 7.427778248 | 5.528939728 | 5.792529892 | 5.590615816 | P | P | P | P | A |
| 1629934_at   | CG14219      | -1.205556971 | 0.000663289 | 0.02345272  | 6.112171827  | 6.828436541 | 6.16770611  | 4.930293379 | 5.284816458 | 5.276533727 | P | P | A | M | P |
| 1630010_a_at | CG17077      | -1.766290943 | 2.51E-07    | 0.000118836 | 7.629147765  | 7.388820477 | 7.590084918 | 5.740592276 | 5.754372088 | 5.814215966 | P | P | P | P | P |
| 1630119_s_at | CG3620       | -2.19047342  | 3.35E-08    | 3.34E-05    | 7.793895568  | 7.889450603 | 7.857543357 | 5.671055851 | 5.746372634 | 5.552040783 | P | P | P | P | P |
| 1630154_at   | CG3437       | -1.921827633 | 5.11E-05    | 0.004268949 | 7.779432618  | 7.284395586 | 7.608356122 | 6.016187279 | 5.214141198 | 5.676372166 | P | P | A | A | P |
| 1630419_a_at | CG7300       | -1.175290408 | 6.73E-06    | 0.001138709 | 8.288420279  | 8.207063147 | 8.50365398  | 7.151336024 | 7.11738143  | 7.204548729 | P | P | P | P | P |
| 1630528_at   | CG17751      | -1.691779169 | 1.69E-05    | 0.002183219 | 8.732346602  | 9.180195106 | 8.695439058 | 7.377092226 | 7.180322291 | 6.975228741 | P | P | P | P | P |
| 1630614_s_at | character(0) | -1.905536258 | 2.86E-07    | 0.000123001 | 9.633796772  | 9.545175475 | 9.438719671 | 7.642545717 | 7.496567947 | 7.761969479 | P | P | P | P | P |
| 1630700_at   | character(0) | -1.522001544 | 4.01E-05    | 0.003564137 | 6.90855133   | 6.930101628 | 7.298019293 | 5.252740309 | 5.791568513 | 5.263588817 | P | P | P | P | A |
| 1630734_at   | CG6240       | -1.426595246 | 5.51E-06    | 0.001023826 | 7.279978318  | 7.528565077 | 7.5225033   | 5.904311726 | 5.949418869 | 6.197529463 | P | P | P | P | P |
| 1630938_a_at | CG14879      | -2.503206018 | 3.95E-08    | 3.74E-05    | 8.140042492  | 8.00065249  | 7.962660558 | 5.385359105 | 5.573725761 | 5.635052622 | P | P | P | P | P |
| 1631475_at   | CG7629       | -2.075346182 | 0.001018591 | 0.030986109 | 5.691108755  | 7.352474939 | 6.130442565 | 4.345921576 | 4.371259857 | 4.28086279  | P | P | A | A | A |
| 1632045_at   | CG5697       | -1.230392272 | 0.00062653  | 0.022788017 | 9.290231324  | 10.04016757 | 9.26089072  | 8.197702582 | 8.310375782 | 8.392034429 | P | P | P | P | P |
| 1632215_at   | CG6296       | -1.403699888 | 1.76E-05    | 0.002198049 | 6.666361798  | 6.778908234 | 6.656552103 | 5.416068719 | 5.473942998 | 5.000710753 | P | P | A | M | A |
| 1632656_at   | CG12112      | -1.091618371 | 0.000727476 | 0.024752483 | 8.510434523  | 8.028562414 | 8.392918615 | 7.547335276 | 6.909536994 | 7.200188171 | P | P | P | P | P |
| 1632720_at   | CG9120       | -1.360694197 | 0.000281689 | 0.013084733 | 7.500924836  | 7.091847266 | 7.755317072 | 6.41171644  | 5.939333832 | 5.914956311 | P | P | P | P | M |
| 1632870_at   | CG32364      | -1.844563776 | 9.96E-05    | 0.006488539 | 8.688127093  | 8.26268786  | 8.262729217 | 7.000183154 | 6.14596219  | 6.858270597 | P | P | P | P | P |
| 1632964_at   | CG15678      | -1.095314294 | 0.001437214 | 0.038309525 | 8.512888807  | 7.895968586 | 7.603300993 | 6.956894365 | 6.890549631 | 6.878771507 | P | P | P | P | P |
| 1632978_at   | CG32207      | -1.426529471 | 7.30E-05    | 0.005284743 | 6.795963371  | 6.241093228 | 6.850347357 | 5.254062205 | 5.292178226 | 5.061575113 | P | P | P | A | P |
| 1633053_at   | CG18108      | -1.413188434 | 0.000325612 | 0.014544153 | 11.10157553  | 10.58413607 | 11.45289986 | 9.585945329 | 9.817939227 | 9.495161601 | P | P | P | P | P |
| 1633481_at   | CG14394      | -1.174137922 | 2.40E-06    | 0.00055758  | 7.621800476  | 7.670650257 | 7.483291433 | 6.46564098  | 6.365239377 | 6.422448043 | P | P | P | P | P |
| 1633599_a_at | CG17725      | -1.037158336 | 0.000828446 | 0.026884764 | 13.00973414  | 13.20359824 | 12.86821453 | 11.62837466 | 12.00373471 | 12.33796253 | P | P | P | P | P |
| 1633709_at   | CG2772       | -1.039196272 | 8.95E-06    | 0.001401642 | 7.5745033653 | 7.743033653 | 7.532459635 | 6.574116408 | 6.505119173 | 6.653178524 | P | P | P | P | M |
| 1633826_at   | CG4715       | -2.130620797 | 7.22E-06    | 0.001200384 | 9.448786363  | 9.558213461 | 9.480596674 | 7.384470366 | 7.731334535 | 6.979929207 | P | P | P | P | P |
| 1633946_at   | CG31955      | -2.206803667 | 2.59E-07    | 0.000119507 | 7.670354328  | 7.733920803 | 7.535020404 | 5.642969887 | 5.379662228 | 5.296252421 | P | P | P | P | P |
| 1634016_at   | CG2781       | -5.977700252 | 1.61E-09    | 5.07E-06    | 10.3034299   | 10.58357143 | 10.59860285 | 4.798134452 | 4.32005958  | 4.434309387 | P | P | P | A | A |
| 1634076_at   | CG12057      | -1.138384028 | 2.72E-05    | 0.002848133 | 12.78714035  | 12.48763614 | 12.65726941 | 11.67829492 | 11.4671466  | 11.37145229 | P | P | P | P | P |
| 1634239_at   | CG14205      | -2.059139045 | 3.01E-07    | 0.000123885 | 7.940751294  | 7.751677487 | 8.17612023  | 5.672221025 | 5.969451017 | 5.690951627 | P | P | A | A | A |
| 1634409_at   | CG31775      | -1.178749673 | 0.000534971 | 0.0207191   | 9.126355246  | 9.182408562 | 9.13384658  | 8.423961493 | 7.605162841 | 7.877237035 | P | P | P | P | P |
| 1634671_a_at | character(0) | -1.145952309 | 0.001029918 | 0.031168984 | 5.640345906  | 4.736209108 | 5.253920912 | 4.031009844 | 4.014114803 | 4.147494353 | P | P | A | A | A |
| 1635065_at   | CG7025       | -1.083956991 | 1.37E-05    | 0.001900535 | 9.052749078  | 9.03210427  | 8.796910282 | 7.870031363 | 7.968402536 | 7.791458757 | P | P | P | P | P |
| 1635200_at   | CG11261      | -1.067859121 | 8.14E-05    | 0.00569423  | 6.490914455  | 6.786948009 | 6.574017233 | 5.775530025 | 5.486997318 | 5.385774992 | P | P | P | P | P |
| 1635263_at   | CG11825      | -1.007456003 | 0.000456715 | 0.018694095 | 8.174314774  | 7.816729077 | 8.229635701 | 7.356304005 | 6.917304725 | 6.924702813 | P | P | P | P | P |
| 1635270_at   | character(0) | -1.903751439 | 3.31E-06    | 0.000715581 | 8.009208016  | 8.130570753 | 7.639234137 | 5.906994303 | 6.162466046 | 5.998298242 | P | P | A | P | A |
| 1635276_at   | CG11437      | -2.072577437 | 7.50E-06    | 0.001235708 | 7.451784052  | 7.885374786 | 7.189603758 | 5.558226764 | 5.323572813 | 5.427203709 | P | P | A | P | A |
| 1635507_at   | CG4269       | -1.119008367 | 1.31E-05    | 0.001865825 | 9.381469807  | 9.228673849 | 9.141421494 | 8.168822054 | 8.235466523 | 7.990251471 | P | P | P | P | P |
| 1635512_at   | CG11893      | -4.126967454 | 1.37E-09    | 5.07E-06    | 7.857651023  | 8.125934994 | 7.931620794 | 3.745756419 | 3.868304764 | 3.920243268 | P | P | A | A | A |
| 1635650_at   | character(0) | -1.041316636 | 3.95E-05    | 0.003538877 | 5.735186990  | 5.962363755 | 5.454490489 | 4.626680545 | 4.885405441 | 4.716005261 | P | P | P | P | A |
| 1635671_at   | CG33290      | -2.036524494 | 0.000213222 | 0.010852713 | 8.061453938  | 8.949548863 | 7.981153339 | 6.0552306   | 6.704370327 | 6.122981732 | P | M | A | A | A |
| 1635793_at   | CG11413      | -1.068925509 | 2.99E-05    | 0.003013807 | 9.34617278   | 10.45171432 | 10.23988187 | 9.270787664 | 9.109021441 | 9.451183342 | P | P | P | P | P |
| 1636015_s_at | CG32850      | -1.118462241 | 3.52E-05    | 0.003318224 | 9.703879253  | 9.732032868 | 9.948068651 | 8.501955342 | 8.884921227 | 8.698717437 | P | P | P | P | P |
| 1636105_at   | CG13675      | -2.144029916 | 7.83E-06    | 0.001279437 | 6.144401146  | 6.881895791 | 6.630428135 | 4.410967924 | 4.304812929 | 4.508854471 | P | P | A | A | A |
| 1636490_at   | PGRP-SB1     | -1.336412633 | 8.41E-06    | 0.001328147 | 9.893716535  | 10.25533893 | 10.20548796 | 8.690550937 | 8.83473939  | 8.820375199 | P | P | P | P | P |
| 1636566_at   | CG32368      | -2.831968347 | 2.10E-05    | 0.002407133 | 7.579398877  | 6.64849359  | 7.78147261  | 4.601958315 | 4.582745066 | 4.328756655 | P | P | A | P | A |
| 1636678_at   | CG14343      | -1.103214834 | 2.44E-05    | 0.002642525 | 5.738409503  | 5.812769762 | 6.047973118 | 4.878162732 | 4.773362808 | 4.63798234  | A | P | A | A | A |
| 1636829_at   | CG31902      | -1.23397477  | 0.0006613   | 0.02345272  | 6.952795877  | 7.563968545 | 7.120509587 | 5.668545767 | 6.329509261 | 5.937294671 | P | M | P | A | A |
| 1637095_at   | CG15818      | -1.255221225 | 0.000309672 | 0.013973565 | 7.197560672  | 6.695845924 |             |             |             |             |   |   |   |   |   |

|              |              |              |             |             |             |             |             |             |             |             |   |   |   |   |   |
|--------------|--------------|--------------|-------------|-------------|-------------|-------------|-------------|-------------|-------------|-------------|---|---|---|---|---|
| 1637833_at   | CG30095      | -1.144256408 | 1.72E-05    | 0.002184696 | 6.951229225 | 7.237476963 | 6.870283229 | 5.910067284 | 5.876574725 | 5.839578182 | P | P | P | P | P |
| 1637900_at   | CG11852      | -1.005881907 | 2.90E-05    | 0.002982708 | 9.625336758 | 9.897039911 | 9.716428907 | 8.766646029 | 8.840451916 | 8.614061911 | P | P | P | P | P |
| 1637963_at   | CG14191      | -1.138554106 | 9.99E-06    | 0.001539743 | 7.424870998 | 7.412587357 | 7.531884469 | 6.206298677 | 6.494662308 | 6.252719521 | P | P | P | P | P |
| 1638016_at   | CG2993       | -1.280649851 | 1.69E-05    | 0.002183219 | 6.511596924 | 6.186373939 | 6.590435531 | 5.115322314 | 5.080001478 | 5.251133047 | P | P | P | P | P |
| 1638053_at   | CG10842      | -2.065085307 | 3.08E-07    | 0.000124043 | 9.966262249 | 10.10097967 | 9.919301412 | 7.968331842 | 7.74497226  | 8.077983312 | P | P | P | P | P |
| 1638054_at   | CG13056      | -1.311039119 | 8.60E-07    | 0.000267275 | 7.474141143 | 7.442707644 | 7.382006747 | 6.15713247  | 6.181399259 | 6.027206449 | P | P | M | A | M |
| 1638096_at   | CG14315      | -1.037299698 | 0.000155717 | 0.008991422 | 5.206364829 | 5.451106411 | 5.694651863 | 4.2664606   | 4.537380249 | 4.436383161 | P | P | A | M | A |
| 1638139_at   | CG31664      | -1.725679677 | 1.03E-05    | 0.001578556 | 6.455996523 | 6.689837954 | 6.38322642  | 4.826178946 | 5.030940892 | 4.49490203  | P | P | A | A | A |
| 1638142_at   | CG3288       | -1.036825828 | 0.00012864  | 0.007889929 | 5.55627385  | 5.983177844 | 5.692325406 | 4.53259349  | 4.752392727 | 4.8363134   | P | P | A | P | A |
| 1638235_at   | CG10794      | -2.331740326 | 7.03E-05    | 0.0051849   | 9.280479697 | 8.735095141 | 9.869465578 | 6.697882539 | 7.180781513 | 7.011155385 | P | P | A | A | A |
| 1638275_at   | CG11699      | -1.067172061 | 9.69E-06    | 0.001505892 | 10.89932527 | 10.92037822 | 10.81865954 | 9.969050246 | 9.727056914 | 9.740739687 | P | P | P | A | P |
| 1638484_at   | CG4190       | -1.751021886 | 8.82E-07    | 0.00026964  | 7.721781692 | 7.638458489 | 7.38284232  | 5.768164991 | 5.908746147 | 5.813105705 | P | P | P | P | P |
| 1638528_at   | CG15531      | -1.038855564 | 1.99E-05    | 0.002356764 | 11.3137666  | 11.52188956 | 11.19780179 | 10.25393334 | 10.35709909 | 10.30585882 | P | P | P | P | P |
| 1638616_at   | CG17084      | -1.469584655 | 1.18E-05    | 0.001735154 | 7.212493569 | 7.594345153 | 7.217302164 | 5.706976985 | 5.958371469 | 5.950038467 | P | P | P | P | P |
| 1638696_a_at | CG3552       | -1.01038418  | 0.001199991 | 0.034448763 | 9.592747404 | 9.783544363 | 9.592326041 | 8.250528798 | 9.041390396 | 8.645546076 | P | P | P | P | P |
| 1638716_a_at | CG10725      | -4.587719153 | 8.97E-09    | 1.55E-05    | 9.707107036 | 9.326242829 | 9.727870053 | 5.215311247 | 4.898272133 | 4.88447908  | P | P | A | P | P |
| 1638778_at   | CG10352      | -1.421114549 | 4.65E-06    | 0.000881182 | 7.08706666  | 7.290440584 | 6.9822046   | 5.696320359 | 5.828448233 | 5.571599606 | P | P | A | P | A |
| 1638974_at   | CG14963      | -1.70112185  | 1.36E-06    | 0.000372782 | 7.5083963   | 7.269220615 | 7.368366162 | 5.852655201 | 5.659494584 | 5.530467741 | P | P | P | P | P |
| 1639019_s_at | CG33470      | -1.185375713 | 0.000446023 | 0.018416184 | 11.51662722 | 11.53767228 | 11.93555764 | 10.095871   | 10.66832743 | 10.66953157 | P | P | P | P | P |
| 1639211_at   | character(0) | -2.311089775 | 3.18E-06    | 0.000701433 | 8.771626348 | 8.587168815 | 8.582541021 | 6.573652888 | 5.939131532 | 6.495282439 | P | P | P | P | P |
| 1639278_at   | CG18105      | -1.183432532 | 2.62E-06    | 0.000597752 | 6.697556059 | 6.846276136 | 6.638220888 | 5.550321429 | 5.495559286 | 5.585874773 | P | P | A | P | P |
| 1639365_at   | CG33495      | -2.008231778 | 1.09E-05    | 0.001635711 | 11.59031313 | 11.35420349 | 11.16490036 | 9.210657754 | 9.724920186 | 9.149143708 | P | P | P | P | P |
| 1639429_at   | Oatp58Da     | -1.074795779 | 3.44E-05    | 0.003277602 | 7.646941012 | 8.047419826 | 7.750269995 | 6.735212729 | 6.712119519 | 6.772911246 | P | P | P | P | P |
| 1639454_at   | CG10912      | -1.024427923 | 8.59E-05    | 0.005901107 | 10.76377096 | 10.78389061 | 10.76011109 | 9.593876029 | 9.617227109 | 10.02338576 | P | P | P | P | P |
| 1639571_s_at | CG18743      | -2.357056833 | 0.001426978 | 0.038234224 | 9.008653681 | 7.17979922  | 7.387338443 | 5.694033943 | 5.65949382  | 5.151093082 | P | P | P | P | P |
| 1639914_at   | CG5961       | -1.619361046 | 2.42E-06    | 0.0005758   | 8.751248807 | 8.603357594 | 8.761941829 | 7.199884553 | 6.861621455 | 7.196959083 | P | P | P | P | P |
| 1639986_at   | CG6854       | -1.533091078 | 3.88E-05    | 0.00349936  | 7.855866392 | 7.363251231 | 7.832915374 | 6.04934661  | 6.011623135 | 6.391790017 | P | P | P | P | P |
| 1640004_at   | CG9726       | -1.720412198 | 5.99E-06    | 0.001070262 | 6.55539226  | 6.420153528 | 6.549965492 | 4.616901424 | 4.646430473 | 5.100942788 | P | P | A | A | A |
| 1640075_a_at | CG3424       | -2.120409487 | 1.43E-07    | 9.02E-05    | 9.511591271 | 9.48841725  | 9.740704467 | 7.381053181 | 7.560138173 | 7.438293174 | P | P | P | P | P |
| 1640400_at   | CG5773       | -1.011387497 | 8.10E-05    | 0.00569423  | 10.85741783 | 11.11008279 | 10.78322162 | 10.04590969 | 9.938996468 | 9.731653582 | P | P | P | P | P |
| 1640404_at   | CG1076       | -1.092287088 | 0.000912266 | 0.028624606 | 6.821434043 | 7.409775349 | 6.929547876 | 5.630923134 | 6.153392301 | 6.099580567 | P | P | P | P | P |
| 1640416_at   | character(0) | -1.411774141 | 9.19E-05    | 0.006195013 | 5.344759672 | 6.006636676 | 5.565912217 | 4.313184183 | 4.3185909   | 4.05021106  | P | A | A | A | A |
| 1640642_at   | CG5192       | -1.025952478 | 2.06E-05    | 0.002401486 | 10.23231833 | 10.29673085 | 10.10525544 | 9.026532408 | 9.285698878 | 9.244215951 | P | P | P | P | P |
| 1640666_at   | CG31205      | -1.905620262 | 1.99E-06    | 0.000509009 | 11.06585039 | 11.29628448 | 11.02425475 | 9.0994703   | 9.470577088 | 9.099481359 | P | P | P | P | P |
| 1640965_at   | CG10050      | -1.146396084 | 0.000300328 | 0.013714269 | 6.437208056 | 5.909725746 | 6.208498505 | 5.317822259 | 4.95159073  | 4.846831065 | P | P | P | P | A |
| 1641084_at   | CG13897      | -1.027261606 | 0.000441558 | 0.018343652 | 7.511608587 | 7.17181675  | 7.184453514 | 6.505845446 | 5.951402178 | 6.32884641  | P | P | P | P | P |
| 1641270_at   | CG8745       | -2.526190529 | 1.38E-06    | 0.000374311 | 10.70904893 | 10.34700136 | 10.44452124 | 7.687272416 | 7.961809932 | 8.272917594 | P | P | P | P | P |
| 1641419_at   | CG4740       | -2.781374143 | 3.25E-05    | 0.003196491 | 9.951408736 | 8.964628068 | 10.18180982 | 6.810197142 | 7.037287991 | 6.906239058 | P | P | P | P | P |
| 1641464_s_at | CG32850      | -1.676783484 | 2.22E-07    | 0.000108057 | 9.307134752 | 9.264613906 | 9.276486176 | 7.483690434 | 7.696140537 | 7.638053412 | P | P | P | P | P |
| 1641738_a_at | CG13636      | -1.520492011 | 2.09E-06    | 0.000528284 | 9.558420242 | 9.197911102 | 9.314058567 | 7.804474336 | 7.847947599 | 7.856491941 | P | P | P | P | P |
| 1641746_at   | CG2555       | -1.490535792 | 1.74E-05    | 0.002184696 | 6.25896689  | 5.888182561 | 6.357740851 | 4.701112194 | 4.812522657 | 4.519648075 | P | P | A | A | A |
