# Supplementary material for: Survival Response to Increased Ceramide Involves Metabolic Adaptation through Novel Regulators of Glycolysis and Lipolysis
Source: PubMed Central journal article supplement (PMC3688504; doi:10.1371/journal.pgen.1003556), 2013-06-20
Supplement: pgen.1003556.s011.pdf [file pgen.1003556.s011.pdf]

| Feature                               | CG      | Peak start | Peak end | Distance to Feature | Shortest Distance | From Overlapping Or Nearest |
|---------------------------------------|---------|------------|----------|---------------------|-------------------|-----------------------------|
| FBgn0014417,chr2L,-,8409050,8411868   | CG13397 | 8406938    | 8408130  | 4334                | 920               | NearestStart                |
| FBgn0000351,chr2L,-,6674636,6676635   | CG11330 | 6679868    | 6680454  | -3526               | 3233              | NearestStart                |
| FBgn0034437,chr2R,+,14878507,14882157 | CG10051 | 14875548   | 14876748 | -2359               | 1759              | NearestStart                |
| FBgn0033674,chr2R,-,7539052,7541177   | CG8964  | 7545060    | 7548984  | -5845               | 3883              | NearestStart                |
| FBgn0033999,chr2R,-,10729194,10730463 | CG8093  | 10725084   | 10727488 | 4177                | 1706              | NearestStart                |
| FBgn0035412,chr3L,+,3171110,3171522   | CG14957 | 3167466    | 3169570  | -2592               | 1540              | NearestStart                |
| FBgn0023479,chr3L,+,9048604,9066072   | CG4821  | 9042480    | 9045180  | -4774               | 3424              | NearestStart                |
| FBgn0037030,chr3L,+,20770051,20770796 | CG3288  | 20772778   | 20773376 | 3026                | 1982              | NearestStart                |
| FBgn0053290,chr3L,+,21476269,21476785 | CG33290 | 21476566   | 21477160 | 594                 | 219               | NearestStart                |
| FBgn0053290,chr3L,+,21476269,21476785 | CG33290 | 21478942   | 21481068 | 3736                | 2157              | NearestStart                |
| FBgn0035131,chr3L,-,313351,315838     | CG17084 | 317770     | 318360   | -2227               | 1932              | NearestStart                |
| FBgn0035998,chr3L,-,9430283,9431608   | CG3437  | 9426446    | 9427658  | 4556                | 2625              | NearestStart                |
| FBgn0036204,chr3L,-,11748080,11748359 | CG11611 | 11752380   | 11752960 | -4311               | 4021              | NearestStart                |
| FBgn0036204,chr3L,-,11748080,11748359 | CG11611 | 11753550   | 11754158 | -5495               | 5191              | NearestStart                |
| FBgn0003076,chr3L,-,16091313,16093855 | CG5165  | 16089146   | 16089768 | 4398                | 1545              | NearestStart                |
| FBgn0003076,chr3L,-,16091313,16093855 | CG5165  | 16090342   | 16091582 | 2893                | 269               | NearestStart                |
| FBgn0036648,chr3L,-,16573396,16574479 | CG4098  | 16571562   | 16572454 | 2471                | 942               | NearestStart                |
| FBgn0036648,chr3L,-,16573396,16574479 | CG4098  | 16572776   | 16573942 | 1120                | 537               | NearestStart                |
| FBgn0036764,chr3L,-,17817882,17820947 | CG5535  | 17818080   | 17818642 | 2586                | 198               | NearestStart                |
| FBgn0020277,chr3L,-,19569655,19571349 | CG8807  | 19573042   | 19574842 | -2593               | 1693              | NearestStart                |
| FBgn0020277,chr3L,-,19569655,19571349 | CG8807  | 19579342   | 19582944 | -9794               | 7993              | NearestStart                |
| FBgn0036906,chr3L,-,19732820,19735129 | CG14102 | 19730852   | 19732344 | 3531                | 476               | NearestStart                |
| FBgn0036906,chr3L,-,19732820,19735129 | CG14102 | 19732964   | 19734770 | 1262                | 144               | NearestStart                |
| FBgn0036906,chr3L,-,19732820,19735129 | CG14102 | 19743144   | 19743748 | -8317               | 8015              | NearestStart                |
| FBgn0036764,chr3L,-,17817882,17822023 | CG5535  | 17818080   | 17818642 | 479                 | 198               | Overlapping                 |
| FBgn0053192,chr3R,+,16360726,16361007 | CG33192 | 16364130   | 16365634 | 4156                | 3123              | NearestStart                |
| FBgn0039628,chr3R,+,24876792,24878047 | CG11841 | 24867630   | 24869468 | -8243               | 7324              | NearestStart                |
| FBgn0039628,chr3R,+,24876792,24878047 | CG11841 | 24871540   | 24872442 | -4801               | 4350              | NearestStart                |
| FBgn0027620,chr3R,+,27619810,27625533 | CG1966  | 27609638   | 27616862 | -6560               | 2948              | NearestStart                |
| FBgn0027620,chr3R,+,27619810,27625533 | CG1966  | 27618030   | 27618632 | -1479               | 1178              | NearestStart                |
| FBgn0037930,chr3R,+,7499940,7500654   | CG14715 | 7502440    | 7503044  | 2802                | 1786              | NearestStart                |
| FBgn0038047,chr3R,+,8255391,8256897   | CG5245  | 8245554    | 8246444  | -9392               | 8947              | NearestStart                |
| FBgn0038067,chr3R,+,8460550,8461924   | CG11598 | 8454634    | 8455266  | -5600               | 5284              | NearestStart                |
| FBgn0038419,chr3R,-,12171851,12174946 | CG14879 | 12175252   | 12177050 | -1205               | 306               | NearestStart                |
| FBgn0003358,chr3R,-,25750946,25751907 | CG31039 | 25759568   | 25760738 | -8246               | 7661              | NearestStart                |
| FBgn0037534,chr3R,-,3807538,3821568   | CG2781  | 3830138    | 3831330  | -9166               | 8570              | NearestStart                |
| FBgn0053105,chr3R,-,5517624,5518516   | CG33105 | 5512868    | 5514954  | 4605                | 2670              | NearestStart                |
| FBgn0053105,chr3R,-,5517624,5518516   | CG33105 | 5519130    | 5522446  | -2272               | 614               | NearestStart                |
| FBgn0053105,chr3R,-,5517624,5518516   | CG33105 | 5524536    | 5525130  | -6317               | 6020              | NearestStart                |
| FBgn0037847,chr3R,-,6689070,6694379   | CG6584  | 6696334    | 6696966  | -2271               | 1955              | NearestStart                |

|                                       |         |          |          |       |      |              |
|---------------------------------------|---------|----------|----------|-------|------|--------------|
| FBgn0038056,chr3R,-,8284140,8285922   | CG5961  | 8283330  | 8283950  | 2282  | 190  | NearestStart |
| FBgn0038056,chr3R,-,8284140,8285922   | CG5961  | 8287540  | 8289064  | -2380 | 1618 | NearestStart |
| FBgn0038243,chr3R,-,10393331,10394532 | CG8066  | 10397430 | 10400154 | -4260 | 2898 | NearestStart |
| FBgn0004369,chr3R,+,25287534,25310461 | CG11516 | 25307436 | 25308332 | 2577  | 2129 | Overlapping  |
| FBgn0004369,chr3R,+,25287534,25310461 | CG11516 | 25308934 | 25309532 | 1228  | 929  | Overlapping  |
| FBgn0052006,chr4,+,171016,173799      | CG32006 | 160834   | 162966   | -9116 | 8050 | NearestStart |
| FBgn0052850,chr4,+,335195,341637      | CG32850 | 329130   | 330348   | -5456 | 4847 | NearestStart |
