# Supplementary material for: Survival Response to Increased Ceramide Involves Metabolic Adaptation through Novel Regulators of Glycolysis and Lipolysis
Source: PubMed Central journal article supplement (PMC3688504; doi:10.1371/journal.pgen.1003556), 2013-06-20
Supplement: pgen.1003556.s012.pdf [file pgen.1003556.s012.pdf]

| SUPER PATHWAY          | PATHWAY                                       | METABOLITE                                 | $d_{cerk}^1 / w_{1118}$ | p value | q value |
|------------------------|-----------------------------------------------|--------------------------------------------|-------------------------|---------|---------|
| Amino acid             | Alanine and aspartate metabolism              | 3-ureidopropionate                         | 1.56                    | 0.0200  | 0.0481  |
| Amino acid             | Alanine and aspartate metabolism              | beta-alanine                               | 0.78                    | 0.2845  | 0.1997  |
| Amino acid             | Butanoate metabolism                          | 2-aminobutyrate                            | 0.99                    | 0.7612  | 0.3937  |
| Amino acid             | Cysteine, methionine, SAM, taurine metabolism | homocysteine                               | 1.12                    | 0.0729  | 0.0918  |
| Amino acid             | Cysteine, methionine, SAM, taurine metabolism | methionine sulfoxide                       | 1.24                    | 0.0441  | 0.0666  |
| Amino acid             | Cysteine, methionine, SAM, taurine metabolism | S-adenosylhomocysteine (SAH)               | 0.78                    | 0.1850  | 0.1512  |
| Amino acid             | Cysteine, methionine, SAM, taurine metabolism | taurine                                    | 1.24                    | 0.0257  | 0.0524  |
| Amino acid             | Glutamate metabolism                          | gamma-aminobutyrate (GABA)                 | 0.83                    | 0.3482  | 0.2251  |
| Amino acid             | Glutamate metabolism                          | N-acetylglutamate                          | 1.18                    | 0.2631  | 0.1877  |
| Amino acid             | Glutathione metabolism                        | 5-oxoproline                               | 1.06                    | 0.3327  | 0.2193  |
| Amino acid             | Glycine, serine and threonine metabolism      | beta-hydroxypyruvate                       | 1.00                    | 0.9981  | 0.4612  |
| Amino acid             | Glycine, serine and threonine metabolism      | betaine                                    | 1.51                    | 0.0056  | 0.0395  |
| Amino acid             | Glycine, serine and threonine metabolism      | homoserine (homoserine lactone)            | 0.94                    | 0.5637  | 0.3101  |
| Amino acid             | Guanidino and acetamido metabolism            | 4-guanidinobutanoate                       | 1.06                    | 0.2456  | 0.1802  |
| Amino acid             | Histidine metabolism                          | 1-methylhistidine                          | 1.21                    | 0.0515  | 0.0716  |
| Amino acid             | Histidine metabolism                          | histamine                                  | 0.84                    | 0.0501  | 0.0706  |
| Amino acid             | Lysine metabolism                             | pipecolate                                 | 0.77                    | 0.3572  | 0.2285  |
| Amino acid             | Phenylalanine & tyrosine metabolism           | phenylalanine                              | 0.98                    | 0.7679  | 0.3956  |
| Amino acid             | Polyamine metabolism                          | 5-methylthioadenosine (MTA)                | 0.73                    | 0.0010  | 0.0306  |
| Amino acid             | Polyamine metabolism                          | putrescine                                 | 0.65                    | 0.0935  | 0.1045  |
| Amino acid             | Polyamine metabolism                          | spermidine                                 | 0.85                    | 0.4110  | 0.2529  |
| Amino acid             | Urea cycle; arginine-, proline-, metabolism   | dimethylarginine                           | 1.23                    | 0.1075  | 0.1126  |
| Amino acid             | Urea cycle; arginine-, proline-, metabolism   | N-acetylarginine                           | 0.45                    | 0.0124  | 0.0444  |
| Amino acid             | Urea cycle; arginine-, proline-, metabolism   | ornithine                                  | 0.78                    | 0.1771  | 0.1493  |
| Amino acid             | Urea cycle; arginine-, proline-, metabolism   | sarcosine (N-Methylglycine)                | 0.42                    | 0.0095  | 0.0437  |
| Amino acid             | Urea cycle; arginine-, proline-, metabolism   | urea                                       | 1.11                    | 0.6287  | 0.3359  |
| Amino acid             | Valine, leucine and isoleucine metabolism     | 3-methyl-2-oxobutyrate                     | 0.51                    | 0.0344  | 0.0607  |
| Amino acid             | Valine, leucine and isoleucine metabolism     | 3-methyl-2-oxovalerate                     | 0.62                    | 0.0228  | 0.0493  |
| Amino acid             | Valine, leucine and isoleucine metabolism     | 4-methyl-2-oxopentanoate                   | 0.43                    | 0.0013  | 0.0306  |
| Amino acid             | Aminosugars metabolism                        | erythronate*                               | 1.44                    | 0.2818  | 0.1989  |
| Carbohydrate           | Starch, and sucrose metabolism                | mannose-6-phosphate                        | 0.76                    | 0.2764  | 0.1961  |
| Carbohydrate           | Nucleotide sugars, pentose metabolism         | 6-phosphogluconate                         | 1.18                    | 0.6008  | 0.3250  |
| Carbohydrate           | Nucleotide sugars, pentose metabolism         | arabitol                                   | 3.41                    | 0.0178  | 0.0453  |
| Carbohydrate           | Nucleotide sugars, pentose metabolism         | gluconate                                  | 0.98                    | 0.7544  | 0.3918  |
| Carbohydrate           | Nucleotide sugars, pentose metabolism         | ribitol                                    | 5.77                    | 0.0018  | 0.0306  |
| Carbohydrate           | Nucleotide sugars, pentose metabolism         | ribose                                     | 0.93                    | 0.6817  | 0.3594  |
| Carbohydrate           | Nucleotide sugars, pentose metabolism         | ribulose 5-phosphate                       | 0.75                    | 0.3399  | 0.2221  |
| Carbohydrate           | Nucleotide sugars, pentose metabolism         | sedoheptulose-7-phosphate                  | 1.27                    | 0.1141  | 0.1167  |
| Carbohydrate           | Nucleotide sugars, pentose metabolism         | xylitol                                    | 0.88                    | 0.2887  | 0.2005  |
| Carbohydrate           | Folate metabolism                             | biopterin                                  | 0.88                    | 0.4161  | 0.2536  |
| Carbohydrate           | Folate metabolism                             | dihydrobiopterin                           | 0.79                    | 0.0375  | 0.0624  |
| Cofactors and vitamins | Pantothenate and CoA metabolism               | acetyl coenzyme A                          | 0.93                    | 0.9216  | 0.4409  |
| Cofactors and vitamins | Pantothenate and CoA metabolism               | coenzyme a                                 | 1.51                    | 0.0414  | 0.0640  |
| Cofactors and vitamins | Pantothenate and CoA metabolism               | pantothenate                               | 1.69                    | 0.0149  | 0.0453  |
| Cofactors and vitamins | Pantothenate and CoA metabolism               | phosphopantetheine                         | 1.20                    | 0.2414  | 0.1791  |
| Cofactors and vitamins | Pterins                                       | isoxanthopterin                            | 0.77                    | 0.0178  | 0.0453  |
| Cofactors and vitamins | Pyridoxal metabolism                          | pyridoxal                                  | 1.20                    | 0.0585  | 0.0759  |
| Cofactors and vitamins | Riboflavin metabolism                         | flavin adenine dinucleotide (FAD)          | 0.75                    | 0.0483  | 0.0704  |
| Cofactors and vitamins | Riboflavin metabolism                         | riboflavin (Vitamin B2)                    | 0.79                    | 0.1125  | 0.1159  |
| Cofactors and vitamins | Thiamine metabolism                           | thiamin (Vitamin B1)                       | 0.75                    | 0.1929  | 0.1518  |
| Cofactors and vitamins | Vitamin B6 metabolism                         | pyridoxate                                 | 0.53                    | 0.0078  | 0.0407  |
| Energy                 | Oxidative phosphorylation                     | acetylphosphate                            | 0.92                    | 0.5600  | 0.3094  |
| Energy                 | Oxidative phosphorylation                     | phosphate                                  | 1.02                    | 0.8529  | 0.4247  |
| Energy                 | Carnitine metabolism                          | 3-dehydrocarnitine*                        | 1.12                    | 0.3264  | 0.2167  |
| Energy                 | Carnitine metabolism                          | acetylcarnitine                            | 0.93                    | 0.1089  | 0.1131  |
| Energy                 | Carnitine metabolism                          | carnitine                                  | 1.13                    | 0.3769  | 0.2376  |
| Energy                 | Carnitine metabolism                          | isobutyrylcarnitine                        | 1.05                    | 0.8656  | 0.4270  |
| Lipid                  | Carnitine metabolism                          | oleoylcarnitine                            | 1.33                    | 0.3173  | 0.2140  |
| Lipid                  | Carnitine metabolism                          | palmitoylcarnitine                         | 1.23                    | 0.4971  | 0.2855  |
| Lipid                  | Essential fatty acid                          | linolenate [alpha or gamma; (18:3n3 or 6)] | 1.38                    | 0.0177  | 0.0453  |
| Lipid                  | Fatty acid, dicarboxylate                     | adipate                                    | 1.48                    | 0.4031  | 0.2492  |
| Lipid                  | Fatty acid, dicarboxylate                     | hexadecanedioate                           | 1.75                    | 0.0008  | 0.0306  |
| Lipid                  | Fatty acid, dicarboxylate                     | sebacate (decanedioate)                    | 0.96                    | 0.8252  | 0.4137  |
| Lipid                  | Fatty acid, monohydroxy                       | 4-hydroxybutyrate (GHB)                    | 1.35                    | 0.3225  | 0.2159  |
| Lipid                  | Fatty alcohol, long chain                     | 1-octadecanol                              | 1.30                    | 0.2387  | 0.1782  |

|             |                                                      |                                   |      |        |        |
|-------------|------------------------------------------------------|-----------------------------------|------|--------|--------|
| Lipid       | Glycerolipid metabolism                              | choline                           | 0.85 | 0.0160 | 0.0453 |
| Lipid       | Glycerolipid metabolism                              | choline phosphate                 | 1.01 | 0.8109 | 0.4091 |
| Lipid       | Glycerolipid metabolism                              | ethanolamine                      | 0.78 | 0.3628 | 0.2309 |
| Lipid       | Glycerolipid metabolism                              | glycerol 3-phosphate (G3P)        | 0.79 | 0.1302 | 0.1229 |
| Lipid       | Glycerolipid metabolism                              | glycerophosphorylcholine (GPC)    | 1.31 | 0.0364 | 0.0624 |
| Lipid       | Glycerolipid metabolism                              | phosphoethanolamine               | 1.05 | 0.8584 | 0.4254 |
| Lipid       | Glycerolipid metabolism                              | phosphoglycerate (2 or 3)         | 0.82 | 0.3707 | 0.2348 |
| Lipid       | Inositol metabolism                                  | inositol 1-phosphate (I1P)        | 1.27 | 0.2112 | 0.1652 |
| Lipid       | Inositol metabolism                                  | myo-inositol                      | 1.23 | 0.1183 | 0.1173 |
| Lipid       | Ketone bodies                                        | 3-hydroxybutyrate (BHBA)          | 1.12 | 0.1875 | 0.1512 |
| Lipid       | Mevalonate metabolism                                | malonate (propanedioate)          | 0.30 | 0.1920 | 0.1518 |
| Lipid       | Mevalonate metabolism                                | mevalonate*                       | 0.64 | 0.0346 | 0.0607 |
| Lipid       | Phospholipid metabolism                              | cytidine 5'-diphosphocholine      | 0.73 | 0.0838 | 0.0969 |
| Lipid       | Phospholipid metabolism                              | cytidine-5'-diphosphoethanolamine | 0.99 | 0.9744 | 0.4518 |
| Lipid       | Sterol/Steroid                                       | ergosterol                        | 1.14 | 0.4578 | 0.2712 |
| Lipid       | Purine metabolism, (hypo)xanthine/inosine containing | hypoxanthine                      | 0.95 | 0.6129 | 0.3302 |
| Lipid       | Purine metabolism, (hypo)xanthine/inosine containing | inosine                           | 0.90 | 0.1044 | 0.1102 |
| Lipid       | Purine metabolism, (hypo)xanthine/inosine containing | xanthine                          | 1.27 | 0.1159 | 0.1171 |
| Lipid       | Purine metabolism, (hypo)xanthine/inosine containing | xanthosine                        | 0.89 | 0.3812 | 0.2391 |
| Nucleotide  | Purine metabolism, adenine containing                | 1-methyladenine                   | 0.67 | 0.0402 | 0.0629 |
| Nucleotide  | Purine metabolism, adenine containing                | 1-methyladenosine                 | 0.98 | 0.9628 | 0.4518 |
| Nucleotide  | Purine metabolism, guanine containing                | 1-methylguanosine                 | 0.78 | 0.0518 | 0.0716 |
| Nucleotide  | Purine metabolism, guanine containing                | guanosine                         | 0.81 | 0.0851 | 0.0969 |
| Nucleotide  | Purine metabolism, guanine containing                | N6-carbamoylthreonyladenosine     | 0.83 | 0.1864 | 0.1512 |
| Nucleotide  | Purine metabolism, urate metabolism                  | allantoin                         | 0.45 | 0.0112 | 0.0441 |
| Nucleotide  | Purine metabolism, urate metabolism                  | urate                             | 0.57 | 0.0389 | 0.0624 |
| Nucleotide  | Pyrimidine metabolism, cytidine containing           | 5-methylcytidine                  | 0.54 | 0.0463 | 0.0683 |
| Nucleotide  | Pyrimidine metabolism, cytidine containing           | cytidine                          | 1.22 | 0.0777 | 0.0951 |
| Nucleotide  | Pyrimidine metabolism, uracil containing             | pseudouridine                     | 0.80 | 0.1172 | 0.1171 |
| Nucleotide  | Pyrimidine metabolism, uracil containing             | uracil                            | 0.87 | 0.1556 | 0.1390 |
| Nucleotide  | Pyrimidine metabolism, uracil containing             | uridine                           | 0.61 | 0.0061 | 0.0396 |
| Nucleotide  | Dipeptide                                            | glutamylvaline                    | 1.02 | 0.8074 | 0.4091 |
| Nucleotide  | Dipeptide                                            | glycylleucine                     | 1.14 | 0.1849 | 0.1512 |
| Nucleotide  | Dipeptide                                            | glycylproline                     | 1.61 | 0.0378 | 0.0624 |
| Nucleotide  | Dipeptide                                            | glycylvaline                      | 2.11 | 0.0002 | 0.0232 |
| Peptide     | Dipeptide                                            | prolylleucine                     | 1.54 | 0.0339 | 0.0607 |
| Peptide     | $\gamma$ -glutamyl                                   | gamma-glutamylglutamine           | 0.75 | 0.0496 | 0.0706 |
| Peptide     | $\gamma$ -glutamyl                                   | gamma-glutamylisoleucine*         | 1.27 | 0.0073 | 0.0407 |
| Peptide     | $\gamma$ -glutamyl                                   | gamma-glutamylleucine             | 1.01 | 0.9726 | 0.4518 |
| Peptide     | $\gamma$ -glutamyl                                   | gamma-glutamylphenylalanine       | 1.13 | 0.4746 | 0.2776 |
| Peptide     | Benzoate metabolism                                  | 4-hydroxybenzoate                 | 0.84 | 0.4317 | 0.2607 |
| Peptide     | Benzoate metabolism                                  | methyl-4-hydroxybenzoate          | 0.69 | 0.2481 | 0.1810 |
| Peptide     | Chemical                                             | glycerol 2-phosphate              | 1.44 | 0.0224 | 0.0493 |
| Peptide     | Chemical                                             | glycolate (hydroxyacetate)        | 1.01 | 0.9236 | 0.4409 |
| Xenobiotics | Sugar, sugar substitute, starch                      | erythritol                        | 1.15 | 0.4521 | 0.2705 |
| Xenobiotics | Sugar, sugar substitute, starch                      | glucoheptose                      | 1.21 | 0.4374 | 0.2630 |
| Xenobiotics | Sugar, sugar substitute, starch                      | sophorose                         | 1.48 | 0.1616 | 0.1390 |
